# Supplementary material
Source: MDPI journal article supplement (https://www.mdpi.com/2071-1050/14/6/3452)
Supplement: s1 [file s1]

## SUPPLEMENTARY MATERIAL

# Quality Control of Emerging Contaminants in Marine Aquaculture Systems by Spot Sampling-Optimized Solid Phase Extraction and Passive Sampling

Panagiota Martinaiou <sup>1</sup>, Panagiota Manoli <sup>1</sup>, Vasiliki Boti <sup>1,2,\*</sup>, Dimitra Hela <sup>1,2,\*</sup>, Elissavet Makou <sup>1</sup>, Triantafyllos Albanis <sup>1,2</sup> and Ioannis Konstantinou <sup>1,2</sup>

<sup>1</sup>Department of Chemistry, University of Ioannina, Ioannina, 45110, Greece

<sup>2</sup>Institute of Environment and Sustainable Development, University Research Center of Ioannina (URCI), University of Ioannina, Ioannina, 45110, Greece;

\* Correspondence: dchela@uoi.gr; vboti@uoi.gr

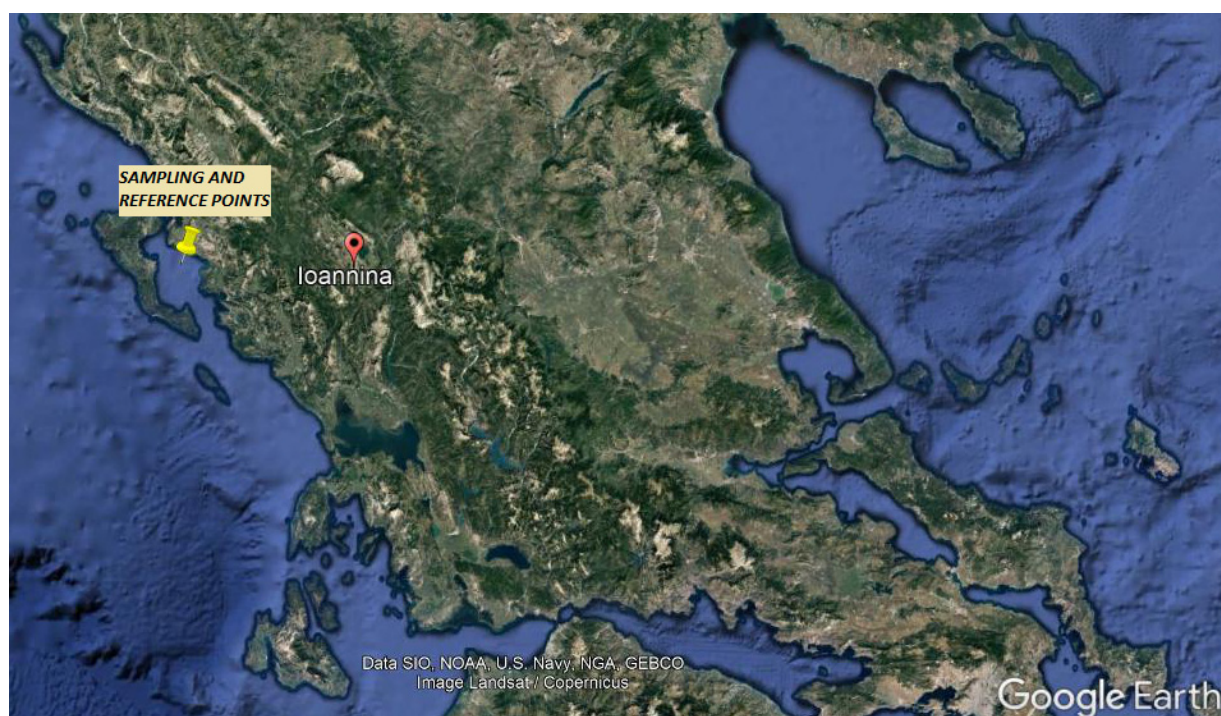

Figure S1. Sampling Location

Table S1. Solid phase extraction protocols tested for pesticides and pharmaceutical compounds efficient removal from waters.

| Protocols                            | Pesticides                                        |                                                   |                                   | Pharmaceuticals                                              |                                                                 |  |
|--------------------------------------|---------------------------------------------------|---------------------------------------------------|-----------------------------------|--------------------------------------------------------------|-----------------------------------------------------------------|--|
|                                      | HLB1                                              | HLB2                                              | HLB3                              | HLB4                                                         | HLB5                                                            |  |
| Sample pH                            |                                                   | No adjustment                                     |                                   | pH 3–3.5                                                     | pH3–3.5                                                         |  |
| Na <sub>2</sub> EDTA addition 5% w/v | -                                                 | -                                                 | 5mL                               | 5mL                                                          | -                                                               |  |
| Activation solvents                  | 5mL MeOH, 5mL H <sub>2</sub> O                    | 6mL MeOH,<br>6mL H <sub>2</sub> O                 | 5mL MeOH,<br>5mL H <sub>2</sub> O | 5mL MeOH, 5mL H <sub>2</sub> O<br>acidified with formic acid | 5mL MeOH, 5mL<br>H <sub>2</sub> O acidified with<br>formic acid |  |
| Wash solvent                         | 5mL H <sub>2</sub> O                              | 6mL H <sub>2</sub> O                              | 5mL H <sub>2</sub> O              | 5mL H <sub>2</sub> O                                         | 5mL H <sub>2</sub> O with 20%<br>MeOH+2% acetic<br>acid         |  |
| Elution solvent                      | 2x5 mL MeOH                                       | 3mL Dichloromethane<br>3mL Hexane<br>3mL Acetone  | 2 × 5 mL MeOH                     | 2 × 5 mL MeOH                                                | 2 × 5 mL MeOH+2%<br>acetic acid                                 |  |
| Injection solvent                    | H <sub>2</sub> O:MeOH (90:10)+0.1%<br>formic acid | H <sub>2</sub> O:MeOH (90:10)+0.1%<br>formic acid | H <sub>2</sub> O:MeOH (90:10)     | H <sub>2</sub> O:MeOH (90:10)+0.1%<br>formic acid            | H <sub>2</sub> O:MeOH (90:10)                                   |  |

Table S2. Detection parameters for full MS/dd-MS<sup>2</sup> analysis of pesticides.

| Compound          | t <sub>R</sub> (min) | Elemental Formula                                                              | Orbitrap MS               |                            |                         | Orbitrap dd-MS <sup>2</sup> <sup>b</sup> |               |
|-------------------|----------------------|--------------------------------------------------------------------------------|---------------------------|----------------------------|-------------------------|------------------------------------------|---------------|
|                   |                      |                                                                                | Theoretical Mass<br>(m/z) | Experimental Mass<br>(m/z) | Mass Accuracy<br>Δ(ppm) | NCE <sup>a</sup><br>(%)                  | Fragment Ions |
| azamethiphos      | 5.18                 | C <sub>9</sub> H <sub>11</sub> ClN <sub>2</sub> O <sub>5</sub> PS <sup>+</sup> | 324.9809                  | 324.9811                   | −0.094                  | 30                                       | 127.9899      |
| azoxystrobin      | 5.79                 | C <sub>22</sub> H <sub>18</sub> N <sub>3</sub> O <sub>5</sub> <sup>+</sup>     | 404.1241                  | 404.1244                   | 0.700                   | 30                                       | 372.0984      |
| boscalid          | 5.94                 | C <sub>18</sub> H <sub>13</sub> Cl <sub>2</sub> N <sub>2</sub> O <sup>+</sup>  | 343.0399                  | 343.0402                   | 0.773                   | 40                                       | 307.0636      |
| malathion         | 6.02                 | C <sub>10</sub> H <sub>20</sub> O <sub>6</sub> PS <sub>2</sub> <sup>+</sup>    | 331.0433                  | 331.0437                   | 1.079                   | 30                                       | 285.0017      |
| irgarol           | 6.15                 | C <sub>11</sub> H <sub>20</sub> N <sub>5</sub> S <sup>+</sup>                  | 254.1434                  | 254.1437                   | 0.907                   | 30                                       | 198.0811      |
| tebufenozide      | 6.30                 | C <sub>22</sub> H <sub>28</sub> N <sub>2</sub> O <sub>2</sub> <sup>+</sup>     | 353.2224                  | 353.2226                   | 0.702                   | 30                                       | 133.0649      |
| pirimiphos-methyl | 6.56                 | C <sub>11</sub> H <sub>20</sub> N <sub>3</sub> O <sub>3</sub> PS <sup>+</sup>  | 306.1036                  | 306.1038                   | 0.827                   | 40                                       | 278.0728      |
| abamectin         | 7.70                 | C <sub>48</sub> H <sub>72</sub> O <sub>14</sub> Na <sup>+</sup>                | 895.4814                  | 895.4827                   | 1.382                   | 30                                       | 751.4027      |

<sup>a</sup>NCE; Normalized Collision Energy. <sup>b</sup>dd-MS<sup>2</sup>;data dependent- MS<sup>2</sup>.

Table S3. Detection parameters for full MS/dd-MS<sup>2</sup> analysis of pharmaceuticals.

| Compound         | tr(min) | Elemental Formula                                                            | Orbitrap MS               |                            | Orbitrap dd-MS <sup>2</sup> <sup>b</sup> |                      |               |
|------------------|---------|------------------------------------------------------------------------------|---------------------------|----------------------------|------------------------------------------|----------------------|---------------|
|                  |         |                                                                              | Theoretical Mass<br>(m/z) | Experimental Mass<br>(m/z) | Mass Accuracy<br>$\Delta$ (ppm)          | NCE <sup>a</sup> (%) | Fragment Ions |
| atenolol         | 3.35    | C <sub>14</sub> H <sub>23</sub> N <sub>2</sub> O <sub>3</sub> <sup>+</sup>   | 267.1703                  | 267.1705                   | 0.802                                    | 30                   | 225.1236      |
| cimetidine       | 3.36    | C <sub>10</sub> H <sub>17</sub> N <sub>6</sub> S <sup>+</sup>                | 253.1230                  | 253.1232                   | 1.099                                    | 30                   | 159.0697      |
| paracetamol      | 3.43    | C <sub>8</sub> H <sub>10</sub> NO <sub>2</sub> <sup>+</sup>                  | 152.0706                  | 152.0706                   | -0.593                                   | 35                   | 110.0597      |
| sulfadiazine     | 3.45    | C <sub>10</sub> H <sub>11</sub> N <sub>4</sub> O <sub>2</sub> S <sup>+</sup> | 251.0597                  | 251.0598                   | 0.281                                    | 35                   | 156.0113      |
| olanzapine       | 3.48    | C <sub>17</sub> H <sub>21</sub> N <sub>4</sub> S <sup>+</sup>                | 313.1481                  | 313.1482                   | 0.254                                    | 40                   | 256.0906      |
| sulfapyridine    | 3.56    | C <sub>11</sub> H <sub>12</sub> N <sub>3</sub> O <sub>2</sub> S <sup>+</sup> | 250.0645                  | 250.0648                   | 1.264                                    | 30                   | 156.0115      |
| amisulpride      | 3.58    | C <sub>17</sub> H <sub>28</sub> N <sub>3</sub> O <sub>4</sub> S <sup>+</sup> | 370.1795                  | 370.1797                   | 0.269                                    | 40                   | 242.0484      |
| trimethoprim     | 3.61    | C <sub>14</sub> H <sub>19</sub> N <sub>4</sub> O <sub>3</sub> <sup>+</sup>   | 291.1462                  | 291.1454                   | 0.617                                    | 30                   | 230.1164      |
| sulfamethazine   | 3.74    | C <sub>12</sub> H <sub>15</sub> N <sub>4</sub> O <sub>2</sub> S <sup>+</sup> | 279.0910                  | 279.0915                   | 1.351                                    | 30                   | 204.0440      |
| sulfamethoxazole | 3.82    | C <sub>10</sub> H <sub>12</sub> N <sub>3</sub> O <sub>3</sub> S <sup>+</sup> | 254.0594                  | 254.0597                   | 0.135                                    | 30                   | 195.0919      |
| mirtazapine      | 3.83    | C <sub>17</sub> H <sub>20</sub> N <sub>3</sub> <sup>+</sup>                  | 266.1652                  | 266.1652                   | 0.203                                    | 30                   | 156.0113      |
| phenazone        | 3.90    | C <sub>11</sub> H <sub>13</sub> N <sub>2</sub> O <sup>+</sup>                | 189.1022                  | 189.1023                   | 0.267                                    | 40                   | 161.1074      |
| risperidone      | 3.90    | C <sub>23</sub> H <sub>28</sub> FN <sub>4</sub> O <sub>2</sub> <sup>+</sup>  | 411.2191                  | 411.2192                   | 0.193                                    | 30                   | 191.1183      |
| bupropion        | 4.00    | C <sub>13</sub> H <sub>19</sub> ClNO <sup>+</sup>                            | 240.1150                  | 240.1151                   | 0.444                                    | 30                   | 184.0526      |
| venlafaxine      | 4.05    | C <sub>17</sub> H <sub>28</sub> NO <sub>2</sub> <sup>+</sup>                 | 278.2115                  | 278.2115                   | 0.219                                    | 35                   | 260.2009      |
| citalopram       | 4.07    | C <sub>20</sub> H <sub>22</sub> FN <sub>2</sub> O <sup>+</sup>               | 325.1711                  | 325.1710                   | 0.170                                    | 20                   | 262.1027      |
| oxolinic acid    | 4.10    | C <sub>13</sub> H <sub>12</sub> NO <sub>5</sub> <sup>+</sup>                 | 262.0710                  | 262.0711                   | 0.538                                    | 40                   | 244.0606      |
| haloperidol      | 4.14    | C <sub>21</sub> H <sub>24</sub> ClFNO <sub>2</sub> <sup>+</sup>              | 376.1474                  | 376.1477                   | 0.864                                    | 30                   | 165.0711      |
| quetiapine       | 4.18    | C <sub>21</sub> H <sub>26</sub> N <sub>3</sub> O <sub>2</sub> S <sup>+</sup> | 384.1740                  | 384.1743                   | 0.679                                    | 20                   | 191.1055      |
| paroxetine       | 4.30    | C <sub>19</sub> C <sub>21</sub> FN <sub>3</sub> O <sub>3</sub> <sup>+</sup>  | 330.1500                  | 330.1501                   | 0.323                                    | 40                   | 192.1185      |
| amitriptyline    | 4.43    | C <sub>20</sub> H <sub>24</sub> N <sup>+</sup>                               | 278.1903                  | 278.1905                   | 0.822                                    | 35                   | 233.1300      |
| fluoxetine       | 4.49    | C <sub>17</sub> H <sub>19</sub> F <sub>3</sub> NO <sup>+</sup>               | 310.1413                  | 310.1418                   | 1.485                                    | 20                   | 148.1122      |
| carbamazepine    | 4.50    | C <sub>15</sub> H <sub>13</sub> N <sub>2</sub> O <sup>+</sup>                | 237.1022                  | 237.1023                   | 0.789                                    | 30                   | 194.0966      |
| sertraline       | 4.60    | C <sub>17</sub> H <sub>18</sub> Cl <sub>2</sub> N <sup>+</sup>               | 306.0811                  | 306.0810                   | 1.008                                    | 30                   | 158.9758      |
| alprazolam       | 4.74    | C <sub>17</sub> H <sub>14</sub> ClN <sub>4</sub> <sup>+</sup>                | 309.0902                  | 309.0903                   | 0.882                                    | 30                   | 281.0717      |
| ketoprofen       | 4.84    | C <sub>16</sub> H <sub>15</sub> O <sub>3</sub> <sup>+</sup>                  | 255.1016                  | 255.1019                   | 1.192                                    | 20                   | 209.0959      |
| bezafibrate      | 4.94    | C <sub>19</sub> H <sub>21</sub> ClNO <sub>4</sub> <sup>+</sup>               | 362.1154                  | 362.1160                   | 1.582                                    | 30                   | 316.1098      |
| diazepam         | 5.09    | C <sub>16</sub> H <sub>14</sub> ClN <sub>2</sub> O <sup>+</sup>              | 285.0789                  | 285.0793                   | 1.389                                    | 40                   | 257.0844      |
| budesonide       | 5.38    | C <sub>25</sub> H <sub>35</sub> O <sub>6</sub> <sup>+</sup>                  | 431.2428                  | 431.2432                   | 0.916                                    | 20                   | 413.2321      |

<sup>a</sup> NCE; Normalized Collision Energy. <sup>b</sup> dd-MS<sup>2</sup>; data dependent- MS<sup>2</sup>.
